# Supplementary material
Source: ML conference proceedings conference paper supplement (https://proceedings.neurips.cc/paper_files/paper/2009/hash/3a15c7d0bbe60300a39f76f8a5ba6896-Abstract.html)
Supplement: Supplementary file [file 3a15c7d0bbe60300a39f76f8a5ba6896-Supplemental.zip]

---

# Correction:

## Convergent Temporal-Difference Learning with Arbitrary Smooth Function Approximation

---

**Hamid R. Maei**  
University of Alberta  
Edmonton, AB, Canada

**Csaba Szepesvári\***  
University of Alberta  
Edmonton, AB, Canada

**Shalabh Bhatnagar**  
Indian Institute of Science  
Bangalore, India

**Doina Precup**  
McGill University  
Montreal, QC, Canada

**David Silver**  
University of Alberta,  
Edmonton, AB, Canada

**Richard S. Sutton**  
University of Alberta,  
Edmonton, AB, Canada

1. There is a sign error in equations (11) and (12). The correct equations are:

$$h(\theta, u) = \mathbb{E}[(\delta - \phi^\top u) \nabla^2 V_\theta(s) u], \quad (11)$$

$$-\frac{1}{2} \nabla J(\theta) = \mathbb{E}[(\phi - \gamma \phi') \phi^\top w] - h(\theta, w) = \mathbb{E}[\delta \phi] - \gamma \mathbb{E}[\phi' \phi^\top w] - h(\theta, w). \quad (12)$$

2. The last equation in the proof of theorem 1 (after the term “Finally, observe that:” ) has a sign error. The correct equation is:

$$\begin{aligned} -\mathbb{E}[(\gamma \phi' - \phi) \phi^\top w] &= \mathbb{E}[(\phi - \gamma \phi') \phi]^\top (\mathbb{E}[\phi \phi^\top]^{-1} \mathbb{E}[\delta \phi]) \\ &= \mathbb{E}[\delta \phi] - \mathbb{E}[\gamma \phi' \phi^\top] (\mathbb{E}[\phi \phi^\top]^{-1} \mathbb{E}[\delta \phi]) = \mathbb{E}[\delta \phi] - \mathbb{E}[\gamma \phi' \phi^\top w]. \end{aligned}$$

---

\*On leave from MTA SZTAKI, Hungary.
